# Supplementary material for: Evidence for differentiated ionic and surface contact effects driving bacterial inactivation by way of genetically modified bacteria
Source: Royal Society of Chemistry journal article supplement (doi:10.1039/c7cc05013e), 2017-01-01
Supplement: c7cc05013e1.pdf [file c7cc05013e1.pdf]

## Evidence for differentiated ionic and surface contact effects driving bacterial inactivation by way of genetically modified bacteria

S. Rtimi,<sup>a\*</sup> V. Nadochenko,<sup>b</sup> I. Khmel<sup>c</sup> and J. Kiwi<sup>a</sup>

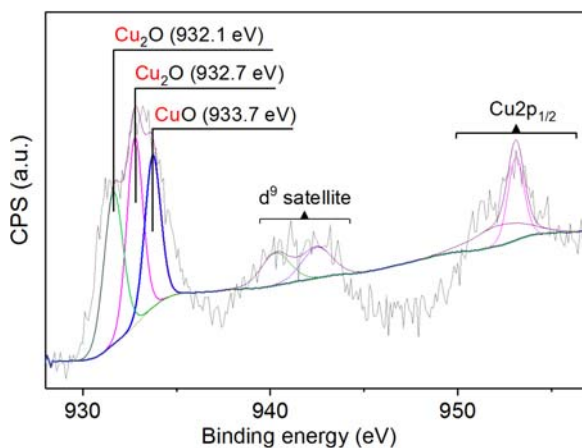

**Supplementary Material 1:** XPS deconvolution of the Cu<sub>2</sub>p<sub>1/2</sub> bands for the Ag-Cu film 50%/50%.

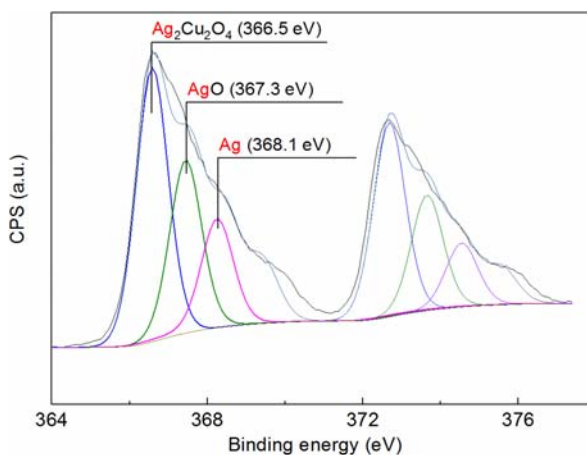

**Supplementary Material 2:** XPS deconvolution of the Ag<sub>3</sub>d<sub>1/2</sub> bands for Ag-Cu film 50%/50%

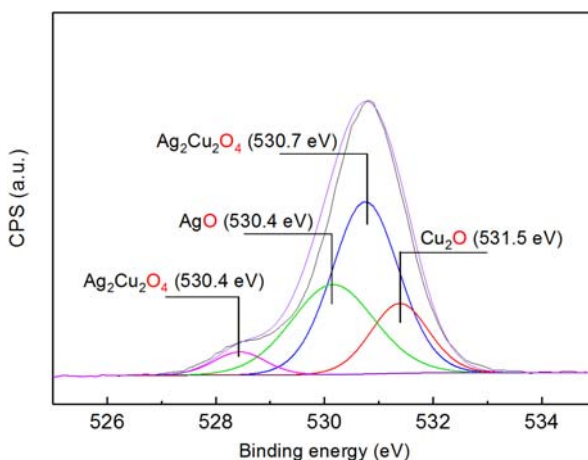

**Supplementary Material 3:** XPS O<sub>1</sub>s deconvolution in Ag-Cu film 50%-50%.
